# Supplementary material
Source: PubMed Central journal article supplement (PMC5142757)
Supplement: NIHMS821372-supplement-supplement_1.pdf [file NIHMS821372-supplement-supplement_1.pdf]

## ONLINE METHODS AND RESULTS

### Human Protection

The Institutional Review Board at Beth Israel Deaconess Medical Center approved the study. The study was conformed to the declaration of Helsinki. Fully anonymized hearts and brain tissue and available clinical data were obtained from organ donors with family approval through the National Disease Research Interchange (NDRI) supported by the National Institute of Health. All donations were with family approval. Strict confidentiality was maintained to protect the privacy of all patients and donors.

### Human subjects

A population of cases of AD was selected from the BIDMC clinical database (Clinical Query-2) and compared to age/gender/ethnicity matched control cases. Cases were selected using a query for the clinical diagnosis of AD (Online Figure 1 and Table 1). For one patient who deceased, the clinical diagnosis of AD was confirmed at pathology (indicated in Supplementary Table 1 with the # symbol). Three patients (indicated in Supplementary Table 1 with the § symbol) presented with a family history of AD. Patients with diagnosis of all other forms of dementia were excluded. Pathological conditions as primary or secondary forms of stages from 1 to 3 of hypertension, history of coronary artery disease, myocardial infarction, hypertrophic or dilated cardiomyopathy, primary or secondary amyloidosis, endocarditis, chemo or radiotherapy at the time of echocardiographic assessment were considered exclusion criteria. Controls were selected from the same query without a diagnosis of AD, from age/gender/ethnicity matched with a 1:2 ratio, when possible. Retrospective demographic, electrocardiographic and echocardiographic parameters were collected to evaluate myocardial function (Online Table 2 and 3). In some cases (indicated in the Online Table 1 with asterisk) echocardiographic recordings was performed before the diagnosis of AD. However in these cases, myocardial dysfunction would have been underestimated.

### Human tissue

Whole heart was obtained from four cases with clinical diagnosis of AD. All cases were without known history of cardiac disease. Organ or tissue harvesting was performed either post-mortem or in patients under respiratory support for other organ explant for donation. Hearts were kept in cold oxygenated Wisconsin cardioplegic solution for transportation to the laboratory.

Brain tissue was obtained from the cortex. The entire brain from the 70 years-old case was sent to the department of neurology at the Johns Hopkins Hospital (JHH). The pathological diagnosis of AD was obtained from this case from the Investigators at the JHH.

### Tissue processing

The hearts were dissected by regions (Anterior Wall - AW, Posterior Wall - PW, Lateral Wall -LW, Septal Wall -SW of the left ventricle -LV, and right ventricular wall -RV). Tissue from each region was frozen in liquid nitrogen and stored at -80°C for molecular biology tests. A sample from the anterior wall was collected in 4% paraformaldehyde-lysine-sodium metaperiodate in 0.1M NaPO<sub>4</sub> (PLP) for immunohistochemistry. Approximately 1mm<sup>3</sup> of the left ventricular AW was also collected in 2% glutaraldehyde in 0.1 M sodium cacodylate buffer for electron microscopy. 1g of myocardial tissue removed from the LV-AW from the 58 years-old CF case was used to isolate cardiomyocytes by enzymatic digestion as previously described(1,2).

### Transmission Electron Microscopy (TEM)

1mm<sup>3</sup> of LV-AW, fixed with glutaraldehyde was dehydrated, infiltrated with EPON-812 resin and embedded in capsules. The enclosed tissue was cut in super-thin sections on a Reichert Ultracut E ultramicrotome. The sections were collected on a formvar-coated slot grid, post stained with uranyl

acetate and lead citrate and viewed in a transmission electron microscope (JEM 1011 transmission electron microscope with digital acquisition of images) at 80 kV (Online Figure 2).

### Immunoblotting

Dot blot was used to test the specificity and sensitivity of the antibodies against A $\beta$ <sub>40</sub> and A $\beta$ <sub>42</sub>. Purified A $\beta$ <sub>40</sub> and A $\beta$ <sub>42</sub> were spotted on nitrocellulose membrane at increasing concentrations (5 to 200ng) for sensitivity. Anti A $\beta$ <sub>40</sub> antibody was used to identify the A $\beta$ <sub>40</sub> peptide and purified A $\beta$ <sub>42</sub> was used as control for specificity. Anti A $\beta$ <sub>42</sub> was used to identify A $\beta$ <sub>42</sub> peptide and purified A $\beta$ <sub>40</sub> was used as control (Online Figure 3).

For immunoblotting, frozen human tissue was lysated in Tris-HCl 50 mM, NaCl 150 mM and Halt™ Protease and Phosphatase Inhibitor cocktail (Thermo). The protein concentration of tissue lysate preparations was measured using the Bradford method(3). 16% Tricine gels were used for electroblotting and the membranes were incubated in Phosphate Buffer Saline (PBS) into a steamer to expose the peptides epitopes(4). For the immunoreactions, the blots were incubated separately with antibodies for anti-A $\beta$ <sub>40</sub> (D8Q7I) (Cell Signaling, #12990) or anti-A $\beta$ <sub>42</sub> (D3R10) (Cell Signaling, #12843) (Online Figure 4).

### Enzyme-Linked-Immuno-Sorbent Assay (ELISA)

Expression levels of A $\beta$ <sub>40</sub> and A $\beta$ <sub>42</sub> peptides were quantified using ELISA Novex kit KHB3481 and KHB3441 according to the manufacturer's instructions.

### Structural staining and Immunohistochemistry

Frozen brain tissues were sectioned at 8 $\mu$ m slices. Sections were blocked with rabbit serum and incubated overnight at 4°C post with anti-oligo A11 antibody (Invitrogen AHB0052) at a concentration of 1:300. After extensive washing, Alexa green 568 secondary antibody of appropriate concentrations was

incubated for 1 hour at room temperature. Aggregates were stained using 0.01% Thyoflavin-S. Sections were imaged with a Zeiss confocal laser-scanning microscope (LSM550 or LSM700).

### Isolated cardiomyocytes

Adult ventricular cardiomyocytes were isolated by enzymatic digestion from the heart of the 58 years old patient from 1g of myocardial tissue removed from the anterior wall of the left ventricle as previously described(2,5). Isolated cardiomyocytes were placed in a chamber on the stage of an inverted microscope, superfused with oxygenated Krebs-Henseleit solution, and electrically stimulated with a biphasic pulse (0.2 Hz, 50 % above threshold). Contraction amplitude and rates of contraction and relaxation were recorded online using a video-edge-detection system and data acquisition software (IonOptix). The fluorescent  $\text{Ca}^{2+}$  indicator Fura-2 (Molecular Probes) was used to measure intracellular  $\text{Ca}^{2+}$  through the use of a dual excitation spectrofluorometer, as previously described(6) (Online Figure 5).

### Statistical analysis

Continuous variables (ultrasound, EKG, and laboratory parameters) are reported as means  $\pm$  S.E.M. if normally distributed, or median and interquartile range for non-normally distributed. Groups were compared using Fisher's *t*-test for categorical and 2-sample Student *t*-test for continuous variables. Mann-Whitney test was employed for non-normally distributed variables and expressed as medians and IQR. Categorical variables (patients demographics, clinical features, and medications) are reported as percentage and analyzed by Fisher's exact test.

Linear regression was used to evaluate the association between group and cardiac parameters adjusted for age, and gender. The effect of age category by group on these parameters was evaluated by likelihood ratio test. Statistical significance was set at the 0.05 level. In case of non-normally distributed residuals, cardiac parameters were eventually transformed by log or square root. ANOVA test or Kruskal-Wallis H

test followed by Bonferroni or Dunn post-hoc analysis was conducted when appropriate for more than two groups comparisons.

Statistical analysis was performed with STATA14 (StataCorp LP, College Station, TX) for MacOS.

## **Online data abbreviations**

AAG=Anti-aggregant

AARRH=Antiarrhythmic

ACE=Angiotensin Converting Enzyme

ACE-I=Angiotensin Converter Enzyme Inhibitor

AchE=Acetylcholinesterase

AD=Alzheimer Disease

AF=Atrial Fibrillation (paroxysmal and non-paroxysmal)

ARB=Angiotensin Receptor Blocker

ASA=Aspirin

AV=Aortic Valve

BB=Beta Blocker

CCB=Calcium Channel Blocker

CM=Caucasian Male

Crtl=Controls

COPD=Chronic Obstructive Pulmonary Disease

CVA=Cerebrovascular Accident

DM=Diabetes Mellitus

FS=Fractional Shortening

High BP=High Blood Pressure Readings.

LA=Left Atrium

LVDD=Left Ventricular End Diastolic Dimensions

LVDS= Left Ventricular End Systolic Dimensions

LVEF=Left Ventricular Ejection Fraction

LVILT=Left Ventricular Infero-Lateral Wall Thickness

LVSWT=Left Ventricular Septal Wall Thickness

MV=Mitral Valve

NSAID=Non Steroidal Anti-inflammatory Drugs

OAC=Oral Anticoagulant

RA=Right Atrium

RBC=Red Blood Cells

SSRI/SNRI=Selective Serotonin/Serotonin-Norepinephrine Reuptake inhibitor, T4=Levothyroxine

4C=Four Chamber view

## REFERENCES

1. Harding SE, Jones SM, O'Gara P, del Monte F, Vescovo G, Poole-Wilson PA. Isolated ventricular myocytes from failing and non-failing human heart; the relation of age and clinical status of patients to isoproterenol response. *Journal of Molecular & Cellular Cardiology* 1992;24:549-64.
2. del Monte F, Kaumann AJ, Poole-Wilson PA, Wynne DG, Pepper J, Harding SE. Coexistence of functioning beta 1- and beta 2-adrenoceptors in single myocytes from human ventricle. *Circulation* 1993;88:854-63.
3. Bradford MM. A rapid and sensitive method for the quantitation of microgram quantities of protein utilizing the principle of protein-dye binding. *Anal Biochem* 1976;72:248-54.
4. Rosen RF, Tomidokoro Y, Ghiso JA, Walker LC. SDS-PAGE/immunoblot detection of Abeta multimers in human cortical tissue homogenates using antigen-epitope retrieval. *J Vis Exp* 2010.
5. Harding SE, MacLeod KT, Jones SM, Vescovo G, Poole-Wilson PA. Contractile responses of myocytes isolated from patients with cardiomyopathy. *Eur Heart J* 1991;12 Suppl D:44-8.
6. del Monte F, Harding SE, Schmidt U et al. Restoration of contractile function in isolated cardiomyocytes from failing human hearts by gene transfer of SERCA2a. *Circulation* 1999;100:2308-11.
7. Kivipelto M, Helkala EL, Laakso MP et al. Apolipoprotein E epsilon4 allele, elevated midlife total cholesterol level, and high midlife systolic blood pressure are independent risk factors for late-life Alzheimer disease. *Ann Intern Med* 2002;137:149-55.
8. Tan ZS, Seshadri S, Beiser A et al. Plasma total cholesterol level as a risk factor for Alzheimer disease: the Framingham Study. *Arch Intern Med* 2003;163:1053-7.
9. Whitmer RA, Sidney S, Selby J, Johnston SC, Yaffe K. Midlife cardiovascular risk factors and risk of dementia in late life. *Neurology* 2005;64:277-81.



10. Luchsinger JA, Reitz C, Honig LS, Tang MX, Shea S, Mayeux R. Aggregation of vascular risk factors and risk of incident Alzheimer disease. *Neurology* 2005;65:545-51.
11. Mielke MM, Zandi PP, Sjogren M et al. High total cholesterol levels in late life associated with a reduced risk of dementia. *Neurology* 2005;64:1689-95.
12. Sano M, Bell KL, Galasko D et al. A randomized, double-blind, placebo-controlled trial of simvastatin to treat Alzheimer disease. *Neurology* 2011;77:556-63.
13. Di Paolo G, Kim TW. Linking lipids to Alzheimer's disease: cholesterol and beyond. *Nat Rev Neurosci* 2011;12:284-96.
14. Gamba P, Testa G, Sottero B, Gargiulo S, Poli G, Leonarduzzi G. The link between altered cholesterol metabolism and Alzheimer's disease. *Ann N Y Acad Sci* 2012;1259:54-64.
15. Reitz C. Dyslipidemia and dementia: current epidemiology, genetic evidence, and mechanisms behind the associations. *J Alzheimers Dis* 2012;30 Suppl 2:S127-45.
16. Reed B, Villeneuve S, Mack W, DeCarli C, Chui HC, Jagust W. Associations between serum cholesterol levels and cerebral amyloidosis. *JAMA Neurol* 2014;71:195-200.
17. Schmidt R, Kienbacher E, Benke T et al. [Sex differences in Alzheimer's disease]. *Neuropsychiatr* 2008;22:1-15.

## ONLINE FIGURES LEGEND

**Online Figure 1:** Flow chart of the clinical data query.

**Online Figure 2: Protein aggregates in AD hearts.** Transmission electron micrographs of all four cases of AD. In each case the image is presented with progressive magnification of significant regions.

**Online Figure 3: A $\beta$  antibody specificity and sensitivity:** Dot blot for the validation of the sensitivity and specificity of the A $\beta_{1-40}$  and A $\beta_{1-42}$  fragments. Upper row: purified A $\beta_{40}$  is spotted at increasing concentrations from 0 to 200ng and detected with anti A $\beta_{40}$  antibody, but not the anti A $\beta_{42}$ . The opposite is shown in the lower row (purified A $\beta_{42}$  at 0 to 200ng detected with the anti A $\beta_{42}$ , but not the anti A $\beta_{40}$  antibody. As controls the highest concentration of purified A $\beta_{42}$  is spotted at the end of the series of purified A $\beta_{40}$  and vice-versa.

**Online Figure 4: SDS page of A $\beta_{40}$  and 42:** Immunoblotting for A $\beta_{40}$  and A $\beta_{42}$  exposed simultaneously for comparison.

**Online Figure 5: *In-vitro* cardiomyocytes function in AD:** Single myocyte representative tracing of cell shortening and Ca<sup>2+</sup> transient from a myocyte isolated from the 58yrs-old AD case (A) showing slow contractility and defect in Ca<sup>2+</sup> handling compared to control (B). C) Schematic representation of the transients parameters measured using the Ion-Optix software. Abbreviations: TTP: Time to peak; R50-R90 time to 50% and 90% relaxation.

**Online Figure 6: Proteolytic pathways of APP and A $\beta$  biogenesis:** Schematic representation of the APP processing by the secretase complex to produce A $\beta_{1-40}$  and A $\beta_{1-42}$  fragments. A $\beta_{40}$  and A $\beta_{42}$  originate from the last 28 aminoacids of the APP N-terminal ectodomain and the first 12 or 14 residues of the transmembrane domain following its cleavage by the alternative protease  $\beta$ -secretase (BACE1). This results in a c99 residue that is processed by the  $\gamma$ -secretase complex to release the A $\beta$  fragments and the APP intracellular domain (AICD). APP processing by  $\alpha$ - and  $\gamma$ -secretase is a normal event whereas the  $\beta$ -

and  $\gamma$ -secretase processing favors the production of the self-aggregating, amyloidogenic  $A\beta_{1-42}$  variant over the shorter, less hydrophobic and amyloidogenic  $A\beta_{1-40}$

**Online Table 1:  
Individual Patients (AD and controls) Demographics and Medications**

| Age | Ethnicity/<br>Gender | Group | Notable Associated Diseases                   | Therapy at the time of cardiac ultrasound           |
|-----|----------------------|-------|-----------------------------------------------|-----------------------------------------------------|
| 53  | CM                   | AD *  | Trisomy 21                                    | T4, SSRI/SNRI                                       |
| 58  | CM                   | AD *  | Dyslipidemia, Benson Dementia                 | Donepezil, Memantine                                |
| 62  | CF                   | AD *  | Dyslipidemia, Neoplasia                       | Statins, T4                                         |
| 63  | CM                   | AD *# |                                               | SSRI                                                |
| 67  | CM                   | AD    | Dyslipidemia                                  | ASA, Statins, Memantine, Vit E                      |
| 73  | CM                   | AD    | AF                                            | Rivastigmine                                        |
| 75  | CF                   | AD §  | Neoplasia                                     | ASA, ACE-i, Donepezil, Memantine, SSRI/SNRI         |
| 75  | CF                   | AD *  |                                               | ASA, T4                                             |
| 76  | CF                   | AD    | Dyslipidemia                                  | ASA, Statins, Donepezil, Vit E                      |
| 78  | CF                   | AD    |                                               |                                                     |
| 79  | CM                   | AD *  | Associated Vascular dementia                  |                                                     |
| 79  | CM                   | AD    | Dyslipidemia, Neoplasia                       | ASA, Donepezil, Vit E, SSRI/SNRI                    |
| 81  | CM                   | AD    | DM, Neoplasia                                 |                                                     |
| 81  | CF                   | AD §  | Dyslipidemia                                  | ASA, NSAID, Statins, T4, Donepezil                  |
| 82  | CM                   | AD *§ |                                               | CCB                                                 |
| 83  | CF                   | AD    |                                               | ASA, T4                                             |
| 84  | CM                   | AD    | Dyslipidemia, Neoplasia, CVA<br>Alcohol abuse | ASA, NSAID, Statins                                 |
| 85  | CF                   | AD    | Neoplasia, AF, CVA                            | Statins, AAG, T4, Galantamine, Memantine, SSRI/SNRI |
| 86  | CF                   | AD    | AF                                            | ASA, BB, T4                                         |
| 86  | CF                   | AD    |                                               | AAG                                                 |
| 89  | CM                   | AD    | Neoplasia                                     | ASA, Vit E                                          |
| 92  | CF                   | AD    | Dyslipidemia                                  | ASA, Statins, SSRI/SNRI                             |
| 53  | CM                   | Ctrl  | AF                                            | OAC, CCB, Statins, AARRH,                           |
| 53  | CM                   | Ctrl  |                                               | ASA, BB,                                            |
| 58  | CM                   | Ctrl  |                                               | ASA                                                 |
| 58  | CM                   | Ctrl  |                                               |                                                     |
| 62  | CF                   | Ctrl  |                                               | T4                                                  |
| 62  | CF                   | Ctrl  |                                               |                                                     |
| 63  | CM                   | Ctrl  | DM                                            | Diuretics                                           |
| 63  | CM                   | Ctrl  |                                               | OAC, T4, SSRI                                       |
| 67  | CM                   | Ctrl  |                                               | OAC                                                 |
| 67  | CM                   | Ctrl  |                                               | ASA, BB,                                            |
| 73  | CM                   | Ctrl  | Dyslipidemia, Neoplasia                       | Statins,                                            |
| 73  | CM                   | Ctrl  | Neoplasia, AF                                 | ASA, OAC, BB, Statins, Digitalis, T4                |
| 75  | CF                   | Ctrl  | Dyslipidemia, AF                              | ASA, OAC, BB, Statins, Digitalis, T4                |
| 75  | CF                   | Ctrl  | High BP                                       | ASA, BB, Diuretics, Statins, Vit E                  |
| 75  | CF                   | Ctrl  |                                               | T4                                                  |
| 76  | CF                   | Ctrl  | Dyslipidemia, COPD                            | BB, Diuretics, T4                                   |
| 76  | CF                   | Ctrl  |                                               |                                                     |
| 78  | CF                   | Ctrl  | DM, COPD, High BP                             | ASA, ARBs                                           |
| 78  | CF                   | Ctrl  | COPD, Neoplasia                               | SSRI/SNRI                                           |
| 79  | CM                   | Ctrl  |                                               | BB, CCB                                             |
| 79  | CM                   | Ctrl  | Neoplasia, AF                                 | OAC, BB, AARRH                                      |
| 81  | CM                   | Ctrl  | AF                                            | OAC, BB, AARRH                                      |
| 81  | CM                   | Ctrl  | n/a                                           | n/a                                                 |
| 81  | CF                   | Ctrl  | Dyslipidemia, Neoplasia                       | ASA, OAC, BB, AARRH,                                |
| 81  | CF                   | Ctrl  | Neoplasia                                     | ASA, BB, T4                                         |
| 82  | CM                   | Ctrl  | High BP, CVA                                  | ASA, Statins                                        |
| 83  | CF                   | Ctrl  |                                               | ASA, Diuretics, Statins, Digitalis                  |
| 83  | CF                   | Ctrl  | AF                                            | BB, AARRH, SSRI/SNRI                                |
| 84  | CM                   | Ctrl  | Neoplasia,                                    | ACE-i, Diuretics,                                   |

|    |    |      |                                  |                                               |
|----|----|------|----------------------------------|-----------------------------------------------|
| 85 | CF | Ctrl | COPD, Neoplasia                  | ASA,                                          |
| 86 | CF | Ctrl |                                  |                                               |
| 86 | CF | Ctrl | n/a                              | n/a                                           |
| 89 | CM | Ctrl | Neoplasia, AF                    |                                               |
| 92 | CF | Ctrl | Dyslipidemia, Neoplasia, High BP | OAC, BB, ACE-I, Diuretics, Statins, Digitalis |
| 92 | CF | Ctrl | n/a                              | n/a                                           |

**Demographic and medications of the individual cases from the clinical cohort.** Asterisk (\*) indicates the patients with echocardiography performed before the diagnosis of AD; (#) indicates AD diagnosis at pathology; (§) indicates family history of AD. Abbreviations: AD=Alzheimer's Disease, CF=Caucasian Female, CM=Caucasian Male, Ctrl=Controls.

Disease Abbreviations: AF=Atrial Fibrillation (paroxysmal and non-paroxysmal), COPD=Chronic Obstructive Pulmonary Disease, CVA=Cerebrovascular Accident, DM=Diabetes Mellitus, High BP=High Blood Pressure Readings.

Therapy Abbreviations AARRH=Antiarrhythmic, AAG=Anti-aggregant, ACE-I=Angiotensin Converter Enzyme Inhibitor, ARB=Angiotensin Receptor Blocker, ASA=Aspirin, BB=Beta Blocker, CCB=Calcium Channel Blocker, NSAID=Non Steroidal Anti-inflammatory Drugs, OAC=Oral Anticoagulant, SSRI/SNRI=Selective Serotonin/Serotonin-Norepinephrine Reuptake inhibitor, T4=Levothyroxine.

**Online Table 2A****Cardiac Ultrasound Parameters of Control and Alzheimer's**

| Measurement                                 | Control (n=35)   | Alzheimer's (n=22) |
|---------------------------------------------|------------------|--------------------|
| LVEF > 55%                                  | 31/35 (88.6)     | 20/22 (90.9)       |
| LVEF ≤ 55%                                  | 4/35 (11.4)      | 2/22 (9.1)         |
| Left Atrium Long Axis (cm)                  | 3.88±0.13        | 3.80±0.16          |
| Left Atrium Four Chambers (cm)              | 5.20 (4.58-5.60) | 4.85 (4.38-5.50)   |
| Right Atrium Four Chambers (cm)             | 5.04±0.12        | 4.74±0.13          |
| Left Ventricle Septal Wall Thickness (cm)   | 1.01±0.04        | 1.12±0.05          |
| Left Ventricle Inferolateral Thickness (cm) | 1.00±0.03        | 1.07±0.05          |
| Left Ventricle Diastolic Dimension (cm)     | 4.62±0.09        | 4.34±0.19          |
| Left Ventricle Systolic Dimension (cm)      | 2.79±0.09        | 2.69±0.12          |
| Left Ventricle Fractional Shortening        | 0.40±0.01        | 0.40±0.01          |
| Aortic Valve Peak Velocity (m/s)            | 1.40 (1.20-1.70) | 1.70 (1.40-2.45)   |
| Mitral Valve E Wave (m/s)                   | 0.70 (0.60-1.00) | 0.70 (0.60-0.88)   |
| Mitral Valve A Wave (m/s)                   | 0.80 (0.60-1.00) | 0.80 (0.73-1.00)   |
| Mitral Valve E/A Ratio                      | 1.00 (0.71-1.29) | 0.89 (0.75-1.00)   |
| Mitral Valve E Wave Deceleration Time (ms)  | 240 (188-275)    | 245 (211-321)      |

**Online Table 2B****Electrocardiographic Parameters of Control and Alzheimer's**

| Measurement       | Control (n=16) | Alzheimer's (n=13) |
|-------------------|----------------|--------------------|
| Rate (bpm)        | 69 (63-77)     | 71 (58-75)         |
| PR interval (ms)  | 179.50±12.04   | 155.20±9.56        |
| QRS interval (ms) | 93.08±4.55     | 93.69±5.75         |
| QT interval (ms)  | 391.23±11.39   | 403.85±11.99       |
| QTc interval (ms) | 426.23±5.68    | 427.46±8.59        |

**Online Table 2C****Laboratory Parameters of Control and Alzheimer's**

| Measurement                 | Control (n=25) | Alzheimer's (n=13) |
|-----------------------------|----------------|--------------------|
| RBCs (10 <sup>6</sup> /mL)  | 4.16±0.16      | 4.20±0.14          |
| Hemoglobin (g/dL)           | 12.85±0.43     | 12.86±0.45         |
| Hematocrit (%)              | 38.47±1.31     | 38.80±1.37         |
| Glucose (mg/dL)             | 100.75±6.56    | 94.09±3.69         |
| Blood Urea Nitrogen (mg/dL) | 19 (15-28)     | 16 (14-19)         |
| Creatinine (mg/dL)          | 1 (0.80-1.15)  | 0.8 (0.78-1)       |
| Cholesterol (mg/dL)         | 197.75±15.71   | 197.75±19.12       |
| HDL (mg/dL)                 | 83.25±9.32     | 52.00±10.22        |
| LDL (mg/dL)                 | 95.75±11.95    | 123.33±10.27       |
| Cholesterol/HDL ratio       | 2.43±0.19      | 4.03±0.41          |

**Clinical parameters from the clinical cohort: A) Echocardiographic, B) Electrocardiographic and C)**

Laboratory data for control and AD patients. Data are expressed as mean±S.E.M. or median and IQR as appropriate. Electrocardiographic and laboratory parameters were similar in the two groups except for the total/HDL cholesterol ratio, as previously described(7-16).

Abbreviations: LVEF=Left Ventricular Ejection Fraction, RBC=Red Blood Cells.

**Online Table 3A**  
**Linear Regression of Cardiac Ultrasound Parameters**

| <b>MV E/A ratio</b> | <b><math>\beta</math></b> | <b>95% CI</b> |            |
|---------------------|---------------------------|---------------|------------|
| Age                 | -0.0151163                | -0.0235409    | -0.0066918 |
| Male                | 0.0823106                 | -0.0920983    | 0.2567195  |
| AD                  | -0.0822727                | -0.2491803    | 0.0846349  |
| Constant            | 2.128903                  | 1.45208       | 2.805725   |

  

| <b>MV E wave</b> | <b><math>\beta</math></b> | <b>95% CI</b> |           |
|------------------|---------------------------|---------------|-----------|
| Age              | -0.0002008                | -0.0074949    | 0.0070933 |
| Male             | -0.1212021                | -0.2722075    | 0.0298033 |
| AD               | -0.0030187                | -0.1475293    | 0.1414919 |
| Constant         | 0.8653827                 | 0.2793816     | 1.451384  |

  

| <b>MV E wave dec</b> | <b><math>\beta</math></b> | <b>95% CI</b> |          |
|----------------------|---------------------------|---------------|----------|
| Age                  | 0.0967297                 | -2.098246     | 2.291705 |
| Male                 | 14.93527                  | -29.11576     | 58.9863  |
| AD                   | 28.95534                  | -15.16514     | 73.07582 |
| Constant             | 226.8564                  | 52.59449      | 401.1183 |

  

| <b>MV A wave</b> | <b><math>\beta</math></b> | <b>95% CI</b> |            |
|------------------|---------------------------|---------------|------------|
| Age              | 0.0103221                 | 0.0039144     | 0.0167298  |
| Male             | -0.2008249                | -0.3334789    | -0.0681709 |
| AD               | 0.0621433                 | -0.0648053    | 0.1890918  |
| Constant         | 0.1422067                 | -0.3725789    | 0.6569922  |

  

| <b>AV Peak V</b> | <b><math>\beta</math></b> | <b>95% CI</b> |           |
|------------------|---------------------------|---------------|-----------|
| Age              | 0.0167994                 | -0.0030387    | 0.0366375 |
| Male             | -0.1458605                | -0.5834821    | 0.291761  |
| AD               | 0.528849                  | 0.0938788     | 0.9638193 |
| Constant         | 0.2903946                 | -1.319209     | 1.899999  |

  

| <b>LA 4C</b> | <b><math>\beta</math></b> | <b>95% CI</b> |           |
|--------------|---------------------------|---------------|-----------|
| Age          | 0.0177469                 | -0.0063522    | 0.0418459 |
| Male         | -0.0597217                | -0.5558531    | 0.4364096 |
| AD           | -0.1151634                | -0.5918724    | 0.3615457 |
| Constant     | 3.85819                   | 1.932203      | 5.784176  |

  

| <b>RA 4C</b> | <b><math>\beta</math></b> | <b>95% CI</b> |           |
|--------------|---------------------------|---------------|-----------|
| Age          | 0.0130019                 | -0.0056556    | 0.0316593 |
| Male         | -0.0250765                | -0.4091807    | 0.3590276 |
| AD           | -0.3341673                | -0.7032348    | 0.0349002 |
| Constant     | 4.081661                  | 2.590565      | 5.572757  |

  

| <b>LVSWT</b> | <b><math>\beta</math></b> | <b>95% CI</b> |           |
|--------------|---------------------------|---------------|-----------|
| Age          | 0.0061874                 | 0.0000449     | 0.0123299 |
| Male         | 0.1509267                 | 0.0227124     | 0.2791411 |
| AD           | 0.0910206                 | -0.0331357    | 0.2151769 |
| Constant     | 0.4766544                 | -0.0122128    | 0.9655216 |

  

| <b>LVILT</b> | <b><math>\beta</math></b> | <b>95% CI</b> |           |
|--------------|---------------------------|---------------|-----------|
| Age          | 0.0043108                 | -0.0007339    | 0.0093556 |
| Male         | 0.1233948                 | 0.0191218     | 0.2276679 |
| AD           | 0.0518126                 | -0.0475914    | 0.1512167 |
| Constant     | 0.6183428                 | 0.2185107     | 1.018175  |



| LVDD     | $\beta$    | 95% CI     |           |
|----------|------------|------------|-----------|
| Age      | -0.0087981 | -0.0271146 | 0.0095184 |
| Male     | 0.1490012  | -0.2371799 | 0.5351822 |
| AD       | -0.2765309 | -0.648296  | 0.0952943 |
| Constant | 5.196918   | 3.734811   | 6.659025  |

| LVSD     | $\beta$    | 95% CI     |           |
|----------|------------|------------|-----------|
| Age      | -0.0063883 | -0.0217811 | 0.0090044 |
| Male     | 0.0330009  | -0.2745182 | 0.34052   |
| AD       | -0.0951309 | -0.3922099 | 0.201948  |
| Constant | 3.245579   | 2.033175   | 4.457983  |

| FS       | $\beta$    | 95% CI     |           |
|----------|------------|------------|-----------|
| Age      | 0.0007699  | -0.0012754 | 0.0028152 |
| Male     | 0.0086295  | -0.0326669 | 0.0499259 |
| AD       | -0.0062402 | -0.0458714 | 0.0333909 |
| Constant | 0.3420622  | 0.1805283  | 0.5035961 |

**Online Table 3B**  
**Linear regression model (transformed) for Cardiac Ultrasound Parameters**

| logMV E/Aratio  |           |            |       |       |            |            |
|-----------------|-----------|------------|-------|-------|------------|------------|
| logMV E/A ratio | $\beta$   | Std. Error | t     | P     | 95% CI     |            |
| Age             | -0.014979 | 0.0040098  | -3.74 | 0.000 | -0.0230215 | -0.0069364 |
| Male            | 0.0769907 | 0.0830116  | 0.93  | 0.358 | -0.0895094 | 0.2434909  |
| AD              | -0.064544 | 0.0794412  | -0.81 | 0.420 | -0.2238829 | 0.094795   |
| Constant        | 1.058021  | 0.32214    | 3.28  | 0.002 | 0.4118895  | 1.704152   |

| Delta-method |       | Prob > $\chi^2 = 0.9603$ |           |       |       |            |            |
|--------------|-------|--------------------------|-----------|-------|-------|------------|------------|
| Tertile      | Group | Margin                   | Std. Err. | t     | P>t   | [95% CI]   |            |
| 1            | Ctrl  | 0.2366164                | 0.1075695 | 2.20  | 0.032 | 0.0205566  | 0.4526761  |
| 1            | AD    | 0.118562                 | 0.1506242 | 0.79  | 0.435 | -0.1839756 | 0.4210997  |
| 2            | Ctrl  | -0.0175869               | 0.0827459 | -0.21 | 0.833 | -0.1837869 | 0.148613   |
| 2            | AD    | -0.0814613               | 0.105437  | -0.77 | 0.443 | -0.2932379 | 0.1303152  |
| 3            | Ctrl  | -0.1916971               | 0.0804634 | -2.38 | 0.021 | -0.3533125 | -0.0300817 |
| 3            | AD    | -0.2409354               | 0.0946027 | -2.55 | 0.014 | -0.4309506 | -0.0509202 |

| logMV E wave |            |            |       |       |            |           |
|--------------|------------|------------|-------|-------|------------|-----------|
| logMV E wave | $\beta$    | Std. Error | t     | P     | 95% CI     |           |
| Age          | -0.000492  | 0.0042456  | -0.12 | 0.908 | -0.0090076 | 0.0080236 |
| Male         | -0.1393212 | 0.0878944  | -1.59 | 0.119 | -0.315615  | 0.0369725 |
| AD           | -0.007378  | 0.084114   | -0.09 | 0.930 | -0.1760893 | 0.1613334 |
| Constant     | -0.1765437 | 0.3410885  | -0.52 | 0.607 | -0.8606806 | 0.5075933 |

| Delta-method |       | Prob > $\chi^2 = 0.8123$ |           |       |       |            |            |
|--------------|-------|--------------------------|-----------|-------|-------|------------|------------|
| Tertile      | Group | Margin                   | Std. Err. | t     | P>t   | [95% CI]   |            |
| 1            | Ctrl  | -0.2274815               | .1130847  | -2.01 | 0.050 | -.4546189  | -.0003441  |
| 1            | AD    | -0.3574009               | 0.1583469 | -2.26 | 0.028 | -0.6754499 | -0.0393519 |
| 2            | Ctrl  | -0.2679996               | 0.0869883 | -3.08 | 0.003 | -0.4427208 | -0.0932784 |
| 2            | AD    | -0.2215672               | 0.1108429 | -2.00 | 0.051 | -0.4442017 | 0.0010673  |
| 3            | Ctrl  | -0.3260913               | 0.0845888 | -3.86 | 0.000 | -0.4959929 | -0.1561897 |

|   |    |            |           |       |       |            |            |
|---|----|------------|-----------|-------|-------|------------|------------|
| 3 | AD | -0.3178453 | 0.0994531 | -3.20 | 0.002 | -0.5176028 | -0.1180879 |
|---|----|------------|-----------|-------|-------|------------|------------|

| sqrtMV E wave deceleration time |  |           |            |      |       |            |           |
|---------------------------------|--|-----------|------------|------|-------|------------|-----------|
| sqrtMV Edecel                   |  | $\beta$   | Std. Error | t    | P     | 95% CI     |           |
| Age                             |  | 0.0010724 | 0.0339143  | 0.03 | 0.975 | -0.0670809 | 0.0692257 |
| Male                            |  | 0.4852337 | 0.6806268  | 0.71 | 0.479 | -0.882537  | 1.853004  |
| AD                              |  | 0.8593871 | 0.6816999  | 1.26 | 0.213 | -0.5105402 | 2.229314  |
| Constant                        |  | 15.07472  | 2.692498   | 5.60 | 0.000 | 9.663947   | 20.4855   |

| Delta-method             |       |          |           |       |       |          |          |
|--------------------------|-------|----------|-----------|-------|-------|----------|----------|
| Prob > $\chi^2 = 0.4609$ |       |          |           |       |       |          |          |
|                          |       | Margin   | Std. Err. | t     | P>t   | [95% CI] |          |
| Tertile                  | Group |          |           |       |       |          |          |
| 1                        | Ctrl  | 14.59658 | 0.8558782 | 17.05 | 0.000 | 12.87378 | 16.31937 |
| 1                        | AD    | 16.96439 | 1.676133  | 10.12 | 0.000 | 13.59051 | 20.33827 |
| 2                        | Ctrl  | 15.66798 | 0.6577161 | 23.82 | 0.000 | 14.34407 | 16.99189 |
| 2                        | AD    | 16.77607 | 0.8380844 | 20.02 | 0.000 | 15.08909 | 18.46305 |
| 3                        | Ctrl  | 15.60497 | 0.6612462 | 23.60 | 0.000 | 14.27395 | 16.93599 |
| 3                        | AD    | 15.64007 | 0.7907345 | 19.78 | 0.000 | 14.0484  | 17.23174 |

| logMV A wave |  |            |            |       |       |            |            |
|--------------|--|------------|------------|-------|-------|------------|------------|
| logMV A wave |  | $\beta$    | Std. Error | t     | P     | 95% CI     |            |
| Age          |  | 0.0146267  | 0.0038278  | 3.82  | 0.000 | 0.0069491  | 0.0223044  |
| Male         |  | -0.2159069 | 0.0792446  | -2.72 | 0.009 | -0.3748515 | -0.0569624 |
| AD           |  | 0.0559627  | 0.0758363  | 0.74  | 0.464 | -0.0961457 | 0.208071   |
| Constant     |  | -1.243943  | 0.3075217  | -4.05 | 0.000 | -1.860754  | -0.6271331 |

| Delta-method             |       |            |           |       |       |            |            |
|--------------------------|-------|------------|-----------|-------|-------|------------|------------|
| Prob > $\chi^2 = 0.6853$ |       |            |           |       |       |            |            |
|                          |       | Margin     | Std. Err. | t     | P>t   | [95% CI]   |            |
| Tertile                  | Group |            |           |       |       |            |            |
| 1                        | Ctrl  | -0.4635664 | 0.1051381 | -4.41 | 0.000 | -0.6747426 | -0.2523903 |
| 1                        | AD    | -0.4818107 | 0.1472196 | -3.27 | 0.002 | -0.77751   | -0.1861114 |
| 2                        | Ctrl  | -0.2494845 | 0.0808755 | -3.08 | 0.003 | -0.4119278 | -0.0870412 |
| 2                        | AD    | -0.1388562 | 0.1030538 | -1.35 | 0.184 | -0.3458459 | 0.0681335  |
| 3                        | Ctrl  | -0.1322672 | 0.0786446 | -1.68 | 0.099 | -0.2902296 | 0.0256952  |
| 3                        | AD    | -0.0748289 | 0.0924644 | -0.81 | 0.422 | -0.2605492 | 0.1108913  |

| logAV Peak Velocity |  |            |            |       |       |            |           |
|---------------------|--|------------|------------|-------|-------|------------|-----------|
| logAV PeakV         |  | $\beta$    | Std. Error | t     | P     | 95% CI     |           |
| Age                 |  | 0.008478   | 0.005027   | 1.69  | 0.100 | -0.0017078 | 0.0186637 |
| Male                |  | -0.1027935 | 0.1108949  | -0.93 | 0.360 | -0.3274879 | 0.1219009 |
| AD                  |  | 0.2490862  | 0.1102231  | 2.26  | 0.030 | 0.0257531  | 0.4724193 |
| Constant            |  | -0.2334682 | 0.4078796  | -0.57 | 0.571 | -1.059911  | 0.5929743 |

| Delta-method             |       |           |           |      |       |            |           |
|--------------------------|-------|-----------|-----------|------|-------|------------|-----------|
| Prob > $\chi^2 = 0.1705$ |       |           |           |      |       |            |           |
|                          |       | Margin    | Std. Err. | t    | P>t   | [95% CI]   |           |
| Tertile                  | Group |           |           |      |       |            |           |
| 1                        | Ctrl  | 0.2753672 | 0.1276608 | 2.16 | 0.038 | 0.0159292  | 0.5348052 |
| 1                        | AD    | 0.248852  | 0.1918487 | 1.30 | 0.203 | -0.1410315 | 0.6387355 |
| 2                        | Ctrl  | 0.4697653 | 0.1248326 | 3.76 | 0.001 | 0.2160749  | 0.7234557 |
| 2                        | AD    | 0.5973677 | 0.1354982 | 4.41 | 0.000 | 0.3220023  | 0.8727332 |
| 3                        | Ctrl  | 0.3531786 | 0.0919523 | 3.84 | 0.001 | 0.1663091  | 0.540048  |
| 3                        | AD    | 0.8194304 | 0.1477948 | 5.54 | 0.000 | 0.5190752  | 1.119786  |

| logLA 4C |            |            |       |       |            |           |
|----------|------------|------------|-------|-------|------------|-----------|
| logLA 4C | $\beta$    | Std. Error | t     | P     | 95% CI     |           |
| Age      | 0.0034866  | 0.0022465  | 1.55  | 0.127 | -0.0010256 | 0.0079988 |
| Male     | -0.004094  | 0.0462488  | -0.09 | 0.930 | -0.0969876 | 0.0887995 |
| AD       | -0.0280638 | 0.0444383  | -0.63 | 0.531 | -0.1173208 | 0.0611932 |
| Constant | 1.371344   | 0.1795385  | 7.64  | 0.000 | 1.01073    | 1.731957  |

| Delta-method |       | Prob > $\chi^2 = 0.5153$ |           |       |       |          |          |
|--------------|-------|--------------------------|-----------|-------|-------|----------|----------|
| Tertile      | Group | Margin                   | Std. Err. | t     | P>t   | [95% CI] |          |
| 1            | Ctrl  | 1.592617                 | 0.0564024 | 28.24 | 0.000 | 1.47915  | 1.706084 |
| 1            | AD    | 1.460568                 | 0.0903913 | 16.16 | 0.000 | 1.278724 | 1.642412 |
| 2            | Ctrl  | 1.635592                 | 0.043251  | 37.82 | 0.000 | 1.548582 | 1.722601 |
| 2            | AD    | 1.576816                 | 0.0590644 | 26.70 | 0.000 | 1.457994 | 1.695638 |
| 3            | Ctrl  | 1.646784                 | 0.0439277 | 37.49 | 0.000 | 1.558412 | 1.735155 |
| 3            | AD    | 1.679975                 | 0.0494364 | 33.98 | 0.000 | 1.580522 | 1.779428 |

**Echocardiographic parameters from the clinical cohort adjusted for age and gender: A)** Linear regression model of the cardiac ultrasound parameters adjusted for age, gender, and clinical status indicating how the echocardiographic parameters change are attributable to each variable. Age and gender are the major risk factors in AD with higher prevalence in women at all age ranges(17). In our analysis gender is also a predicting variable for functional changes, however here we focused on the contribution of age as described in our results section. **B)** Linear regression model and estimates for transformed data after visually inspecting the distribution of residuals. Data represent the  $\chi^2$  analysis of the ones in part illustrated in Figure 5B.

Abbreviations: LA=Left Atrium, RA=Right Atrium, 4C=Four Chamber view, LVSWT=Left Ventricular Septal Wall Thickness, LVILT=Left Ventricular Infero-Lateral Wall Thickness, LVDD=Left Ventricular End Diastolic Dimensions, LVDS= Left Ventricular End Systolic Dimensions, FS=Fractional Shortening, AV=Aortic Valve MV=Mitral Valve.

**Online Table 4****Clinical Characteristics of Control and Alzheimer's with known drug management**

| Feature                       | Control with $\beta$ -blocker (n=13) | Control without $\beta$ -blocker (n=19) | Alzheimer's (n=22) |
|-------------------------------|--------------------------------------|-----------------------------------------|--------------------|
| Age – Median (IQR)            | 79 (75-81)                           | 75 (62.5-82.5)                          | 79 (73.5-83.8)     |
| Male gender – no. (%)         | 6/13 (46.2)                          | 10/19 (52.6)                            | 11/22 (50)         |
| Caucasian Ethnicity – no. (%) | 13/13 (100)                          | 19/19 (100)                             | 22/22 (100)        |
| Medical History – no. (%)     |                                      |                                         |                    |
| Diabetes                      | 0/13 (0)                             | 2/19 (10.5)                             | 1/22 (4.5)         |
| Dyslipidemia                  | 4/13 (30.8)                          | 1/19 (5.3)                              | 8/22 (36.4)        |
| Neoplasia                     | 5/13 (38.5)                          | 5/19 (26.3)                             | 7/22 (31.8)        |
| High Blood Pressure Readings  | 2/13 (15.4)                          | 2/19 (10.5)                             | 0/22 (0)           |
| Atrial Fibrillation           | 5/13 (38.5)                          | 2/19 (10.5)                             | 3/22 (13.6)        |
| Cerebrovascular Accidents     | 0/13 (0)                             | 1/19 (5.3)                              | 2/22 (9.1)         |
| Medications – no. (%)         |                                      |                                         |                    |
| Aspirin                       | 7/13 (53.9)                          | 5/19 (26.3)                             | 11/22 (50)         |
| NSAIDs                        | 0/13 (0)                             | 0/19 (0)                                | 2/22 (9.1)         |
| Oral Anticoagulants           | 6/13 (46.2)                          | 3/19 (15.8)                             | 0/22 (0)           |
| Antiaggregants                | 0/13 (0)                             | 0/19 (0)                                | 2/22 (9.1)         |
| Statins                       | 4/13 (30.8)                          | 4/19 (21.1)                             | 7/22 (31.8)        |
| Antiarrhythmics               | 4/13 (30.8)                          | 1/19 (5.3)                              | 0/22 (0)           |
| Digoxin                       | 3/13 (23.1)                          | 1/19 (5.3)                              | 0/22 (0)           |
| $\beta$ -blockers             | 13/13 (100)                          | 0/19 (0)                                | 1/22 (4.5)         |
| Calcium channel blockers      | 1/13 (7.7)                           | 1/19 (5.3)                              | 1/22 (4.5)         |
| ACE inhibitors                | 1/13 (7.7)                           | 1/19 (5.3)                              | 1/22 (4.5)         |
| ARBs                          | 0/13 (0)                             | 1/19 (5.3)                              | 0/22 (0)           |
| Diuretics                     | 3/13 (23.1)                          | 3/19 (15.8)                             | 0/22 (0)           |
| Levothyroxine                 | 4/13 (30.8)                          | 3/19 (15.8)                             | 7/22 (31.8)        |
| Any AchE inhibitors           | 0/13 (0)                             | 0/19 (0)                                | 7/22 (31.8)        |
| Donepezil                     | 0/13 (0)                             | 0/19 (0)                                | 5/22 (22.7)        |
| Rivastigmine                  | 0/13 (0)                             | 0/19 (0)                                | 1/22 (4.5)         |
| Galantamine                   | 0/13 (0)                             | 0/19 (0)                                | 1/22 (4.5)         |
| Memantine                     | 0/13 (0)                             | 0/19 (0)                                | 4/22 (18.2)        |
| SSRI/SNRI                     | 1/13 (7.7)                           | 2/19 (10.5)                             | 6/22 (27.3)        |
| Vitamin E                     | 1/13 (7.7)                           | 0/19 (0)                                | 4/22 (18.2)        |

**Demographic features, clinical presentation and drug prescriptions recorded at the time of cardiac ultrasound dividing controls based on the presence of beta-blockers therapy and AD patients.**

Abbreviations in alphabetical order: ACE=Angiotensin Converting Enzyme, AchE=Acetylcholinesterase, ARB=Angiotensin Receptor Blocker, SSRI/SNRI=Selective Serotonin/Serotonin-Norepinephrine Reuptake inhibitors.

| Feature                          | Subgroups                            |                                         |                    | ANOVA or H test with post-hoc analysis |                |               |               |
|----------------------------------|--------------------------------------|-----------------------------------------|--------------------|----------------------------------------|----------------|---------------|---------------|
|                                  | Control with $\beta$ -blocker (n=13) | Control without $\beta$ -blocker (n=19) | Alzheimer's (n=22) | p                                      | p (BB+ vs BB-) | p (AD vs BB+) | p (AD vs BB-) |
| LA Long Axis (cm)                | 4.05±0.17                            | 3.74±0.21                               | 3.80±0.16          | 0.534                                  | 0.856          | 1.000         | 1.000         |
| LA Four Chambers (cm)            | 5.40 (5.20-5.80)                     | 5.10 (4.18-5.38)                        | 4.85 (4.38-5.50)   | 0.049                                  | 0.009          | 0.022         | 0.339         |
| RA Four Chambers (cm)            | 5.25±0.16                            | 4.82±0.17                               | 4.74±0.13          | 0.071                                  | 0.202          | 0.082         | 1.000         |
| LV Septal Wall Thickness (cm)    | 1.05±0.05                            | 0.98±0.04                               | 1.12±0.05          | 0.175                                  | 1.000          | 1.000         | 0.190         |
| LV Inferolateral Thickness (cm)  | 1.00±0.04                            | 0.98±0.04                               | 1.07±0.05          | 0.356                                  | 1.000          | 0.993         | 0.520         |
| LV Diastolic Dimension (cm)      | 4.65±0.17                            | 4.58±0.11                               | 4.34±0.19          | 0.352                                  | 1.000          | 0.592         | 0.784         |
| LV Systolic Dimension (cm)       | 2.85±0.18                            | 2.79±0.10                               | 2.69±0.12          | 0.695                                  | 1.000          | 1.000         | 1.000         |
| LV Fractional Shortening         | 0.39±0.02                            | 0.40±0.01                               | 0.40±0.01          | 0.955                                  | 1.000          | 1.000         | 1.000         |
| AV Peak Velocity (m/s)           | 1.60 (1.50-1.90)                     | 1.20 (1.15-1.45)                        | 1.70 (1.40-2.45)   | 0.024                                  | 0.021          | 0.422         | 0.006         |
| MV E Wave (m/s)                  | 0.70 (0.60-1.00)                     | 0.70 (0.60-0.95)                        | 0.70 (0.60-0.88)   | 0.915                                  | 0.359          | 0.348         | 0.492         |
| MV A Wave (m/s)                  | 0.80 (0.70-0.90)                     | 0.80 (0.60-0.95)                        | 0.80 (0.73-1.00)   | 0.425                                  | 0.337          | 0.235         | 0.098         |
| MV E/A Ratio                     | 1.00 (0.88-1.00)                     | 1.00 (0.76-1.36)                        | 0.89 (0.75-1.00)   | 0.439                                  | 0.487          | 0.160         | 0.125         |
| MV E Wave Deceleration Time (ms) | 235 (219-240)                        | 240 (176-277)                           | 245 (211-321)      | 0.437                                  | 0.444          | 0.132         | 0.143         |

| Feature           | Subgroups                           |                                        |                    | ANOVA or H test with post-hoc analysis |                |               |               |
|-------------------|-------------------------------------|----------------------------------------|--------------------|----------------------------------------|----------------|---------------|---------------|
|                   | Control with $\beta$ -blocker (n=8) | Control without $\beta$ -blocker (n=8) | Alzheimer's (n=13) | p                                      | p (BB+ vs BB-) | p (AD vs BB+) | p (AD vs BB-) |
| Rate (bpm)        | 68 (63-71)                          | 75 (65-84)                             | 71 (58-75)         | 0.667                                  | 0.189          | 0.356         | 0.262         |
| PR interval (ms)  | 185.33±11.72                        | 158.8±13.53                            | 155.20±9.56        | 0.159                                  | 0.477          | 0.198         | 1.000         |
| QRS interval (ms) | 93.75±3.57                          | 93.25±6.81                             | 93.69±5.75         | 0.998                                  | 1.000          | 1.000         | 1.000         |
| QT interval (ms)  | 393±16.08                           | 398.5±13.45                            | 403.85±11.99       | 0.850                                  | 1.000          | 1.000         | 1.000         |
| QTc interval (ms) | 416.38±7.96                         | 431.25±6.41                            | 427.46±8.59        | 0.489                                  | 0.780          | 1.000         | 1.000         |

**Clinical parameters from the clinical cohort dividing controls based on the presence of beta-blockers therapy and AD patients A) Echocardiographic, B) Electrocardiographic data are expressed as mean±S.E.M. or median and IQR as appropriate. Data indicate that diastolic function was not affected by the therapeutic regimen. Abbreviations: LA=Left Atrium, RA=Right Atrium, 4C=Four Chamber view, LVSWT=Left Ventricular Septal Wall Thickness, LVILT=Left Ventricular Infero-Lateral Wall Thickness, LVDD=Left Ventricular End Diastolic Dimensions, LVDS= Left Ventricular End Systolic Dimensions, FS=Fractional Shortening, AV=Aortic Valve MV=Mitral Valve.**

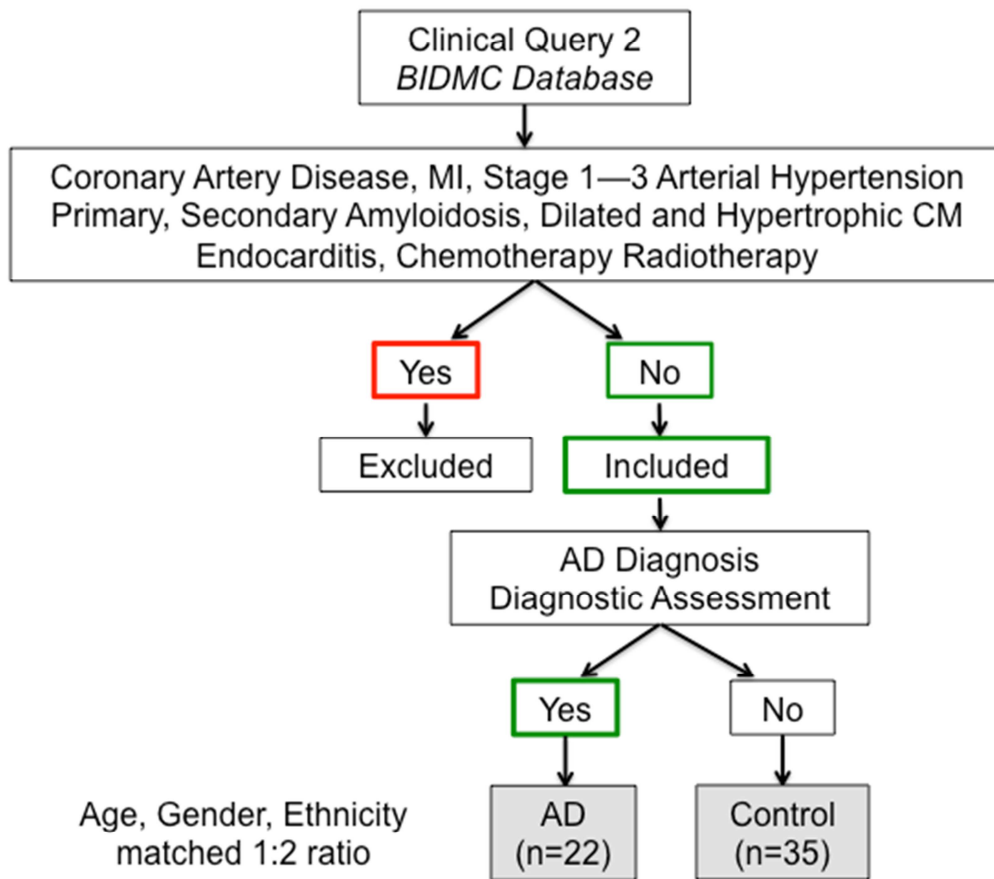

Online Figure 1

58 years-old female

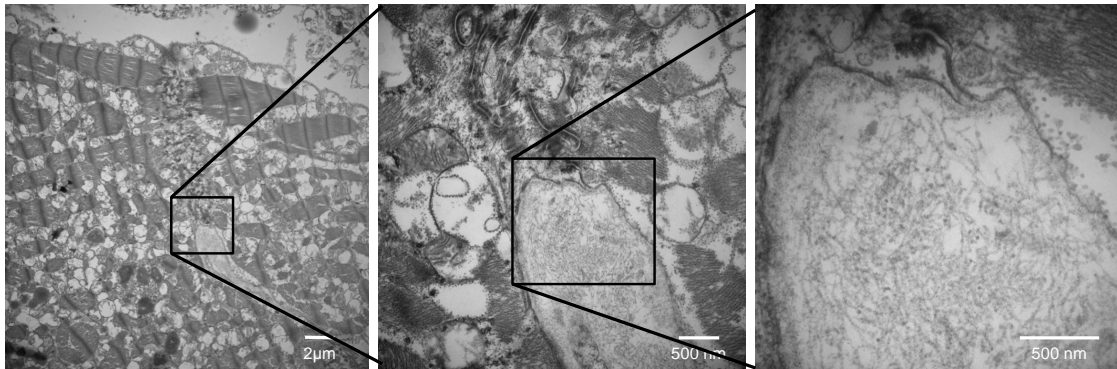

70 years-old female

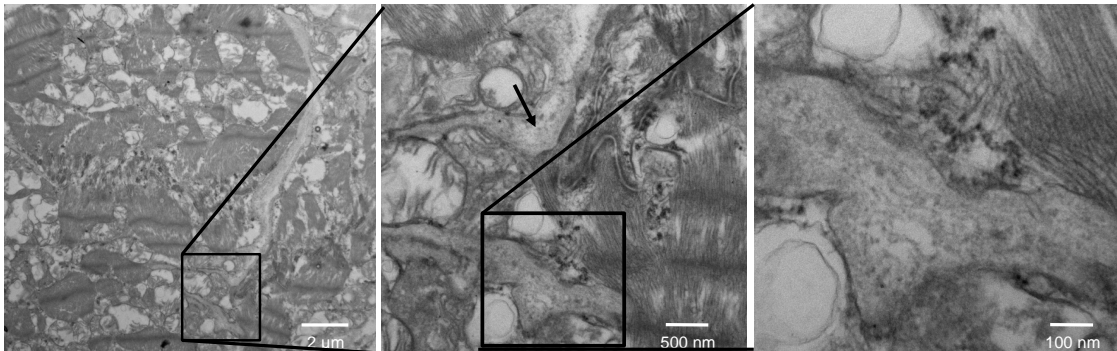

84 years-old female

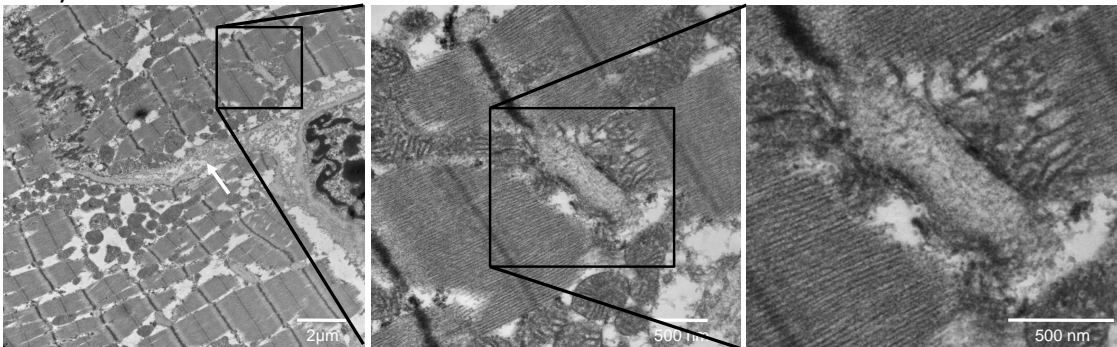

91 years-old male

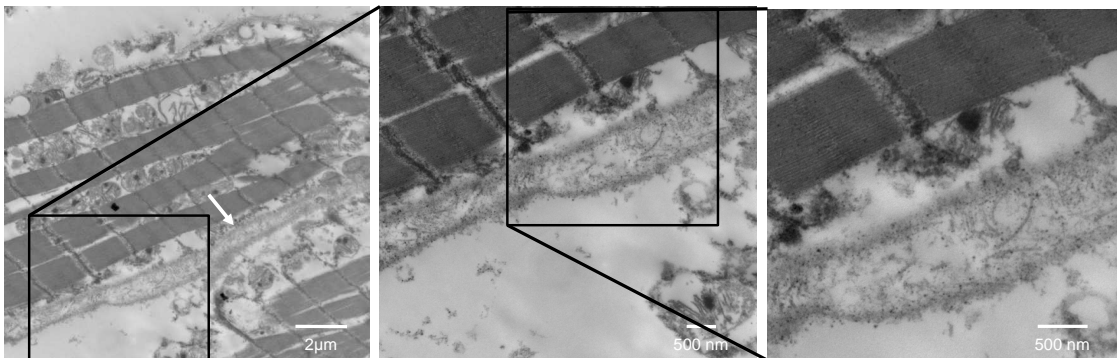

Online Figure 2

### Antibodies Specificity

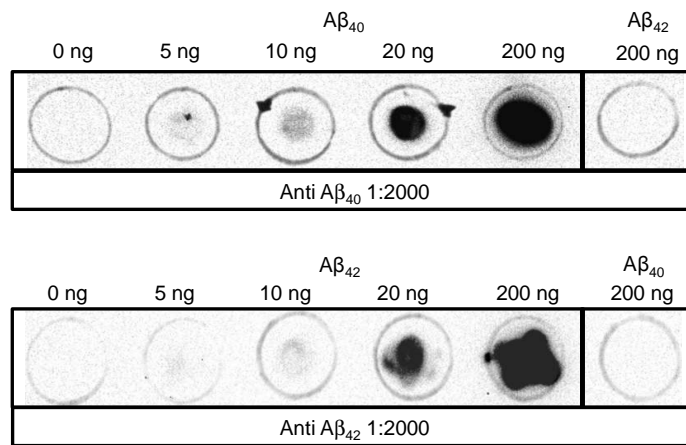

Online Figure 3



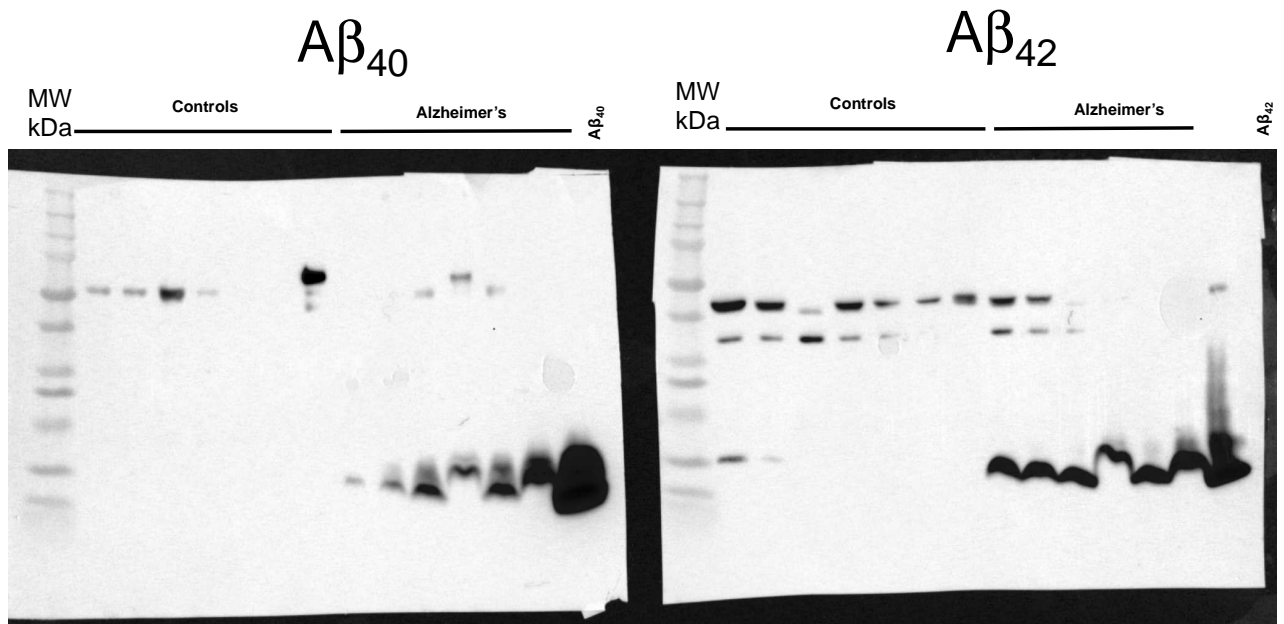

Online Figure 4

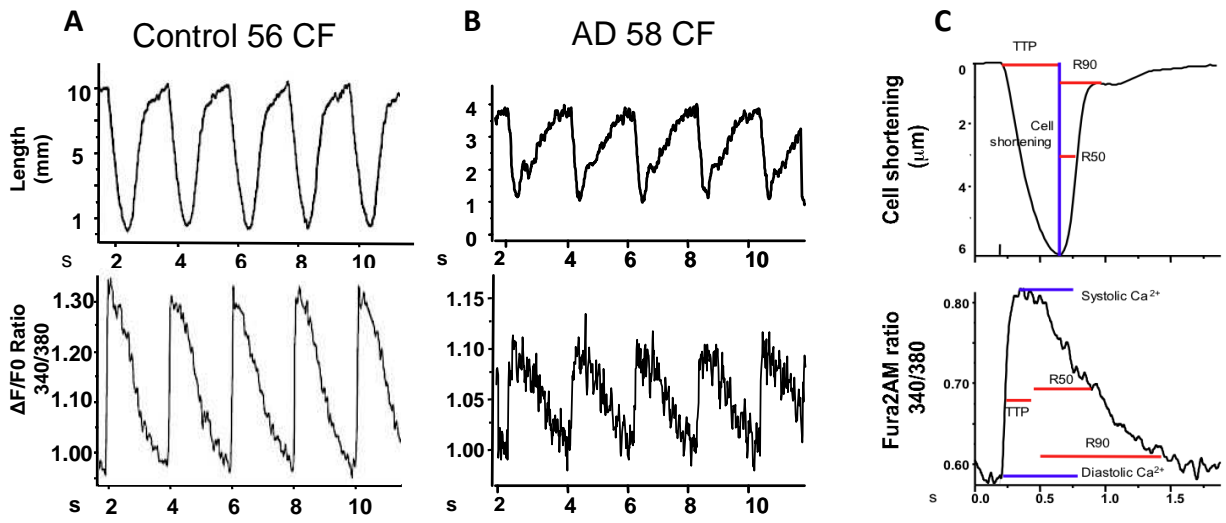

Online Figure 5

# Amyloid precursor protein (APP) processing

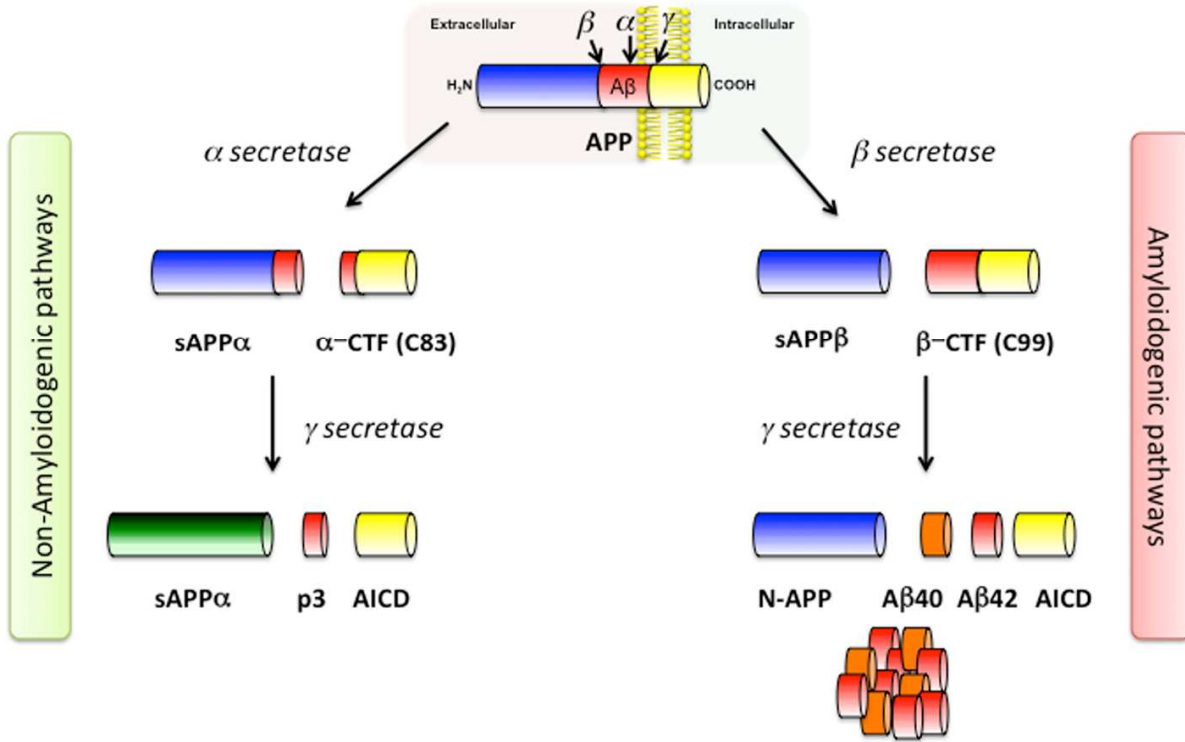

Online Figure 6
